# Supplementary material for: An Interpretable Double-Scale Attention Model for Enzyme Protein Class Prediction Based on Transformer Encoders and Multi-Scale Convolutions
Source: Front Genet. 2022 Apr 1;13:885627. doi: 10.3389/fgene.2022.885627 (PMC9012241; doi:10.3389/fgene.2022.885627)
Supplement: Supplementary file 1 [file Table2.XLSX]

## Sheet: S2. Matched Proteins and Motifs
protein id	accession number	dataset	motif	start	end	protein count	motif count
3SPM_DENJA	P28375	ECPred	Cell attachment site	42	44	351	113
5HT2C_HUMAN	P28335	ECPred	PDZ-binding	455	457	*All protein sequences and annotations are included in the Swiss-Prot dataset, and their first accession numbers recorded in Swiss-Prot are shown in this table.
AGR3_HUMAN	Q8TD06	ECPred	Prevents secretion from ER	162	165
AMRP_HUMAN	P30533	ECPred	Prevents secretion from ER	353	356
ANM8_HUMAN	Q9NR22	ECPred	SH3-binding 2	52	57
AQP8_HUMAN	O94778	ECPred	NPA 2	209	211
AYR1_SCHPO	Q09851	ECPred	GXSXG	10	14
BAD_HUMAN	Q92934	ECPred	BH3	109	123
BAD_MOUSE	Q61337	ECPred	BH3	146	160
BADH1_ORYSJ	O24174	ECPred	Microbody targeting signal	502	504
BCH_GENLU	B3SGL0	ECPred	Histidine box-2	188	192
C25HL_CAEEL	Q20027	ECPred	Histidine box-1	147	151
CAP6_ADE05	P24937	ECPred	Nuclear localization signal	244	247
CAPSD_HBVC4	P0C6H6	ECPred	Bipartite nuclear localization signal	157	174
CAPSD_HBVG3	P0C682	ECPred	Bipartite nuclear localization signal	169	186
CARDA_CYNCA	Q9XFX3	ECPred	KGE motif	454	456
CD63_HUMAN	P08962	ECPred	Lysosomal targeting motif	233	237
CE15_UNKP	A0A0K2VM55	ECPred	GXSYXG catalytic site motif	265	270
CHMP6_HUMAN	Q96FZ7	ECPred	Type-2 MIT-interacting motif	167	178
CLD1_YEAST	P53264	ECPred	GXSXG lipase motif	227	231
CLH1_ARATH	O22527	ECPred	GXSXG	135	139
CLH1_CITSI	Q9MV14	ECPred	GXSXG	144	148
CNPY1_DANRE	Q2L6L1	ECPred	Prevents secretion from ER	183	186
CORA_METJA	Q58439	ECPred	Probable selectivity filter	277	279
CORA_THEMA	Q9WZ31	ECPred	Probable selectivity filter	311	313
CUE5_YEAST	Q08412	ECPred	AIM	372	375
CXE1_ACTER	Q0ZPV7	ECPred	Involved in the stabilization of the negatively charged intermediate by the formation of the oxyanion hole	89	91
CXE15_ARATH	Q9FG13	ECPred	Involved in the stabilization of the negatively charged intermediate by the formation of the oxyanion hole	82	84
CXE18_ARATH	Q9LT10	ECPred	Involved in the stabilization of the negatively charged intermediate by the formation of the oxyanion hole	93	95
CXL14_HUMAN	O95715	ECPred	D-box	66	80
DDX19_DICDI	Q54TF8	ECPred	Q motif	69	97
DEGS_SCHPO	O59715	ECPred	Histidine box-3	289	293
DEK_HUMAN	P35659	ECPred	Nuclear localization signal	204	220
DESA_ARTPT	Q54794	ECPred	Histidine box-1	88	92
DESI1_HUMAN	Q6ICB0	ECPred	Nuclear export signal 2	138	152
DESI1_MOUSE	Q9CQT7	ECPred	Nuclear export signal 2	138	152
DPN_DROME	Q26263	ECPred	WRPW motif	431	434
E3GL_ADE02	P68978	ECPred	Di-lysine motif	155	158
ECH1P_ARATH	Q6NL24	ECPred	Microbody targeting signal	262	264
ECH2_ARATH	Q8VYI3	ECPred	Microbody targeting signal	306	308
ELO3_YEAST	P40319	ECPred	HxxHH motif	184	188
ERG3_LEPMC	Q8J207	ECPred	Histidine box-2	204	208
ERG32_SCHPO	O13666	ECPred	Histidine box-1	169	174
EST_ACIVR	P18773	ECPred	Involved in the stabilization of the negatively charged intermediate by the formation of the oxyanion hole	78	80
FAC2A_CALOF	Q9FPP8	ECPred	Histidine box-1	94	98
FAD3E_TOBAC	P48626	ECPred	Histidine box-1	96	100
FAD6C_ARATH	P46312	ECPred	Histidine box-1	170	174
FADS6_MOUSE	Q80UG1	ECPred	Histidine box-3	276	280
FKBP2_DEBHA	Q6BP84	ECPred	Prevents secretion from ER	131	134
FOLQ_LACLA	Q9CGE1	ECPred	Nudix box	72	93
FRG1_HUMAN	Q14331	ECPred	Nuclear localization signal	21	31
G45IP_HUMAN	Q8TAE8	ECPred	Nuclear localization signal	183	199
GPDA_LEIME	P90551	ECPred	Microbody targeting signal	363	365
H2AV_DROME	Q9VBB1	ECPred	[ST]-Q motif	137	138
HOG1_EMENI	Q9P419	ECPred	TXY	170	172
HPR1_ARATH	Q9C9W5	ECPred	Microbody targeting signal	383	385
I13R1_HUMAN	P78552	ECPred	Box 1 motif	373	381
IL2RG_HUMAN	P31785	ECPred	WSXWS motif	236	240
KCNA1_HUMAN	Q09470	ECPred	Selectivity filter	371	376
KCNA2_MOUSE	P63141	ECPred	Selectivity filter	373	378
KCNA2_ONCMY	Q9I830	ECPred	Selectivity filter	368	373
KCNC1_HUMAN	P48547	ECPred	Selectivity filter	399	404
KLRBC_MOUSE	P27814	ECPred	LCK-binding motif	30	33
LAAT1_RAT	B0BMY1	ECPred	Di-leucine motif	289	290
LOA1_YEAST	Q06508	ECPred	HXXXXD motif	100	105
LPE10_YEAST	Q02783	ECPred	YGMN	352	355
LPL1_YEAST	Q08448	ECPred	Lipase-specific GXSXG motif	87	91
MATRX_VSIVA	P03519	ECPred	dynamin binding	1	3
MCL1_MOUSE	P97287	ECPred	BH3	189	203
MESD_MOUSE	Q9ERE7	ECPred	Prevents secretion from ER	220	223
MGL2_YEAST	Q03649	ECPred	GXSXG	229	233
MGLL_SCHPO	O94305	ECPred	GXSXG	96	100
MK01_HUMAN	P28482	ECPred	Nuclear translocation motif	326	332
MK12_DANRE	O42376	ECPred	TXY	180	182
MK14_HUMAN	Q16539	ECPred	TXY	179	181
MK14_MOUSE	P47811	ECPred	TXY	179	181
MMP8_HUMAN	P22894	ECPred	Cysteine switch	88	95
MU180_SCHPO	Q9HDV1	ECPred	Involved in the stabilization of the negatively charged intermediate by the formation of the oxyanion hole	124	126
MZB1_HUMAN	Q8WU39	ECPred	Prevents secretion from ER	185	188
NCEH1_HUMAN	Q6PIU2	ECPred	Involved in the stabilization of the negatively charged intermediate by the formation of the oxyanion hole	112	114
NDX8_CAEEL	Q9NA25	ECPred	Microbody targeting signal	231	233
NUD14_HUMAN	O95848	ECPred	Nudix box	110	128
OXDD1_CAEEL	O45307	ECPred	Microbody targeting signal	331	333
P53_HUMAN	Q8J016	ECPred	[KR]-[STA]-K motif	369	371
PLPL2_HUMAN	Q96AD5	ECPred	DGA/G	165	167
PLPL2_MOUSE	Q8BJ56	ECPred	DGA/G	165	167
PLPL2_RAT	P0C548	ECPred	DGA/G	165	167
PLSC_BACSU	O07584	ECPred	HXXXXD motif	38	43
PLSC_HELPY	O25903	ECPred	HXXXXD motif	73	78
PLSC_LIMDO	Q42870	ECPred	HXXXXD motif	108	113
PLSC_MYCGE	Q49402	ECPred	HXXXXD motif	91	96
PMAT1_ARATH	Q940Z5	ECPred	DFGWG motif	412	416
PMAT2_ARATH	Q9LRQ8	ECPred	DFGWG motif	394	398
PMK1_CAEEL	Q17446	ECPred	TXY	190	192
PRDX5_HUMAN	Q9UKX4	ECPred	Microbody targeting signal	211	213
PSN1_HUMAN	P49768	ECPred	PAL	432	434
PSNB_DICDI	Q54DE8	ECPred	PAL	438	440
RCN1_HUMAN	Q15293	ECPred	Prevents secretion from ER	327	330
REV_HV1H3	P69718	ECPred	Nuclear localization signal and RNA-binding (RRE)	33	49
RGL1_ARATH	Q9C8Y3	ECPred	VHYNP motif	72	76
RITA1_XENLA	P0CJ62	ECPred	Nuclear export signal	11	23
RPN11_YEAST	P43588	ECPred	JAMM motif	108	121
RPPH_RHIME	Q92LA8	ECPred	Nudix box	47	68
RPPH_SHEON	Q8EH98	ECPred	Nudix box	37	58
SAY1_YEAST	P53324	ECPred	Involved in the stabilization of the negatively charged intermediate by the formation of the oxyanion hole	175	177
SCD6_YEAST	P45978	ECPred	TFG box	259	279
SCJ1_YEAST	P25303	ECPred	Cell attachment site	287	289
SDF1_HUMAN	Q9H554	ECPred	Receptor activation motif	21	22
SKP2_HUMAN	Q13309	ECPred	Nuclear localization signal	66	72
SMO11_ARATH	Q8L7W5	ECPred	Histidine box-3	238	244
SMO22_ARATH	Q8VWZ8	ECPred	Histidine box-3	218	224
SPB10_CHICK	O73790	ECPred	Nuclear localization signal	79	83
SSB_DEIRA	Q9RY51	ECPred	Important for interaction with partner proteins	295	300
STR3N_HUMAN	O95772	ECPred	FFAT	207	212
SYC_ENCCU	Q8SRE0	ECPred	'HIGH' region	32	42
SYC_OPITP	B1ZSX8	ECPred	'HIGH' region	31	41
SYE_ALKMQ	A6TWK7	ECPred	'KMSKS' region	257	261
SYE_AQUAE	O67271	ECPred	'KMSKS' region	241	245
SYE_BDEBA	Q6MKR6	ECPred	'KMSKS' region	258	262
SYE_BORDL	B5RLR1	ECPred	'KMSKS' region	265	269
SYE_CHLTE	Q9F724	ECPred	'KMSKS' region	258	262
SYE_CLOD6	Q18CD6	ECPred	'KMSKS' region	257	261
SYE_CORGL	Q8NQX9	ECPred	'KMSKS' region	253	257
SYE_DEHM1	Q3Z6S3	ECPred	'KMSKS' region	244	248
SYE_ELUMP	B2KAV3	ECPred	'KMSKS' region	255	259
SYE_FLAJ1	A5FL73	ECPred	'KMSKS' region	259	263
SYE_HYDS0	B4U896	ECPred	'KMSKS' region	239	243
SYE_LAWIP	Q1MR60	ECPred	'KMSKS' region	235	239
SYE_MESFL	Q6F0G6	ECPred	'KMSKS' region	252	256
SYE_METI4	B3DXK4	ECPred	'KMSKS' region	212	216
SYE_MYCPE	Q8EU94	ECPred	'KMSKS' region	254	258
SYE_MYCPN	P75114	ECPred	'KMSKS' region	251	255
SYE_MYCPU	P53662	ECPred	'KMSKS' region	251	255
SYE_NATTJ	B2A4B3	ECPred	'KMSKS' region	251	255
SYE_ONYPE	Q6YR76	ECPred	'KMSKS' region	213	217
SYE_OPITP	B1ZUV7	ECPred	'KMSKS' region	224	228
SYE_PARUW	Q6MEN1	ECPred	'KMSKS' region	249	253
SYE_PELTS	A5D5L8	ECPred	'HIGH' region	7	17
SYE_PELUB	Q4FM56	ECPred	'KMSKS' region	238	242
SYE_PROM5	A2BVD5	ECPred	'KMSKS' region	247	251
SYE_PSEAE	Q9XCL6	ECPred	'KMSKS' region	250	254
SYE_PSEU5	A4VNT7	ECPred	'KMSKS' region	250	254
SYE_RHIME	P15189	ECPred	'KMSKS' region	252	256
SYE_SODGM	Q2NSC4	ECPred	'KMSKS' region	236	240
SYE_THET8	P27000	ECPred	'KMSKS' region	242	246
SYE_THEYD	B5YIG1	ECPred	'KMSKS' region	233	237
SYE_TROW8	Q83HJ1	ECPred	'KMSKS' region	254	258
SYE_UREU1	B5ZCB4	ECPred	'KMSKS' region	251	255
SYE_VESOH	A5CWX9	ECPred	'KMSKS' region	230	234
SYE_VIBPA	Q87RL6	ECPred	'KMSKS' region	239	243
SYE1_COXBU	Q83EV3	ECPred	'KMSKS' region	236	240
SYE1_LEVBA	Q03U68	ECPred	'KMSKS' region	260	264
SYE1_PETMO	A9BJB2	ECPred	'KMSKS' region	229	233
SYE1_RICPR	Q9ZDK3	ECPred	'KMSKS' region	239	243
SYE1_THEMA	Q9X172	ECPred	'KMSKS' region	249	253
SYE1_WOLPM	Q73HV5	ECPred	'KMSKS' region	251	255
SYE2_ANAMM	Q5PAG8	ECPred	'KMSKS' region	235	239
SYE2_EHRRW	Q5HB98	ECPred	'KMSKS' region	237	241
SYE2_HELPY	O25360	ECPred	'KMSKS' region	231	235
SYE2_NEOSM	Q2GD33	ECPred	'KMSKS' region	197	201
SYE2_SYNAS	Q2LUT2	ECPred	'KMSKS' region	251	255
SYE2_THEMA	Q9X2I8	ECPred	'KMSKS' region	253	257
SYE2_WOLPM	Q73H00	ECPred	'KMSKS' region	237	241
SYW_ARCFU	O28579	ECPred	'KMSKS' region	307	311
SYW_BACSU	P21656	ECPred	'KMSKS' region	192	196
SYW_BRUME	P67586	ECPred	'KMSKS' region	216	220
SYW_GLOVI	Q7NCG8	ECPred	'KMSKS' region	199	203
SYW_METJA	Q58810	ECPred	'HIGH' region	74	82
SYW_METMA	Q8PWV5	ECPred	'KMSKS' region	374	378
SYW_PYRHO	O59584	ECPred	'KMSKS' region	252	256
SYW_RICCN	Q92HR1	ECPred	'KMSKS' region	194	198
SYW_SACS2	Q97ZX0	ECPred	'KMSKS' region	252	256
SYW_THEAC	Q9HIW5	ECPred	'KMSKS' region	313	317
SYWC_SCHPO	Q09692	ECPred	'HIGH' region	90	99
SYY_ACHLI	A9NHF4	ECPred	'HIGH' region	38	47
SYY_BACTN	Q8A2S5	ECPred	'HIGH' region	36	45
SYY_BRADU	Q89M63	ECPred	'HIGH' region	43	52
SYY_CLOTE	Q891D3	ECPred	'HIGH' region	40	49
SYY_FLAPJ	A6GW04	ECPred	'HIGH' region	37	46
SYY_MYCGA	Q7NBH9	ECPred	'HIGH' region	37	46
SYY_MYCGE	P47693	ECPred	'HIGH' region	40	49
SYY_MYCH2	Q601Y5	ECPred	'HIGH' region	42	51
SYY_MYCMO	Q6KH97	ECPred	'HIGH' region	38	47
SYY_MYCMS	Q6MST3	ECPred	'HIGH' region	39	48
SYY_MYCPE	Q8EUX2	ECPred	'HIGH' region	40	49
SYY_MYCS5	Q4A5E2	ECPred	'HIGH' region	37	46
SYY_ORITB	A5CC73	ECPred	'HIGH' region	38	47
SYY_PARUW	Q6MC06	ECPred	'HIGH' region	37	46
SYY_PYRHO	O58739	ECPred	'KMSKS' region	250	254
SYY_WOLPM	Q73G50	ECPred	'HIGH' region	43	52
SYY1_PYRAE	Q8ZYT7	ECPred	'KMSKS' region	245	249
SYY2_STRT1	Q5LZR6	ECPred	'HIGH' region	37	46
SYYM_DICDI	Q54WD9	ECPred	'HIGH' region	89	98
TAF7_HUMAN	Q15545	ECPred	[KR]-[STA]-K motif	2	4
TAZ_DROME	Q9V6G5	ECPred	HXXXXD motif	187	192
TBL27_ARATH	O04523	ECPred	DXXH motif	389	392
TEBP_BOVIN	Q3ZBF7	ECPred	PXLE motif	156	159
TEBP_MOUSE	Q9R0Q7	ECPred	PXLE motif	156	159
TGL2_YEAST	P54857	ECPred	(A/G)XSXG lipase motif	141	145
TGL5_SCHPO	Q9Y827	ECPred	GXGXXG	144	149
THPR_AQUAE	O66967	ECPred	HXTX 1	41	44
THYX_HELPY	O26061	ECPred	ThyX motif	73	83
TMG4_HUMAN	Q9BZD6	ECPred	LPXY motif; mediates binding to WW domain-containing proteins	185	188
VOA1_YEAST	P53262	ECPred	ER retention motif	261	264
Y2781_YERPE	Q8ZD12	ECPred	Nudix box	72	94
YJJU_ECOLI	P39407	ECPred	DGA/G	182	184
YL446_MIMIV	Q5UQP2	ECPred	GXSXG	92	96
YL620_MIMIV	Q5UR65	ECPred	GXSXG	73	77
YQHO_BACSU	P54513	ECPred	GXGXXG	8	13
YTKD_BACSU	O35013	ECPred	Nudix box	52	73
ZFN2B_HUMAN	Q8WV99	ECPred	CAAX motif	253	256
3SPM_DENJA	P28375	ECPred	Cell attachment site	42	44
AQP8_HUMAN	O94778	ECPred	NPA 2	209	211
BAD_HUMAN	Q92934	ECPred	BH3	109	123
BADH1_ORYSJ	O24174	ECPred	Microbody targeting signal	502	504
BCH_GENLU	B3SGL0	ECPred	Histidine box-2	188	192
CAP6_ADE05	P24937	ECPred	Nuclear localization signal	244	247
CAPSD_HBVC4	P0C6H6	ECPred	Bipartite nuclear localization signal	157	174
CAPSD_HBVG3	P0C682	ECPred	Bipartite nuclear localization signal	169	186
CD63_HUMAN	P08962	ECPred	Lysosomal targeting motif	233	237
CE15_UNKP	A0A0K2VM55	ECPred	GXSYXG catalytic site motif	265	270
CHMP6_HUMAN	Q96FZ7	ECPred	Type-2 MIT-interacting motif	167	178
CLD1_YEAST	P53264	ECPred	GXSXG lipase motif	227	231
CNPY1_DANRE	Q2L6L1	ECPred	Prevents secretion from ER	183	186
CORA_METJA	Q58439	ECPred	Probable selectivity filter	277	279
CORA_THEMA	Q9WZ31	ECPred	Probable selectivity filter	311	313
CXE18_ARATH	Q9LT10	ECPred	Involved in the stabilization of the negatively charged intermediate by the formation of the oxyanion hole	93	95
CXL14_HUMAN	O95715	ECPred	D-box	66	80
DDX19_DICDI	Q54TF8	ECPred	Q motif	69	97
DEGS_SCHPO	O59715	ECPred	Histidine box-3	289	293
DEK_HUMAN	P35659	ECPred	Nuclear localization signal	204	220
DESA_ARTPT	Q54794	ECPred	Histidine box-1	88	92
DESI1_HUMAN	Q6ICB0	ECPred	Nuclear export signal 2	138	152
DESI1_MOUSE	Q9CQT7	ECPred	Nuclear export signal 2	138	152
ECH2_ARATH	Q8VYI3	ECPred	Microbody targeting signal	306	308
ELO3_YEAST	P40319	ECPred	HxxHH motif	184	188
ERG32_SCHPO	O13666	ECPred	Histidine box-1	169	174
FAC2A_CALOF	Q9FPP8	ECPred	Histidine box-1	94	98
FAD3E_TOBAC	P48626	ECPred	Histidine box-1	96	100
FADS6_MOUSE	Q80UG1	ECPred	Histidine box-3	276	280
FOLQ_LACLA	Q9CGE1	ECPred	Nudix box	72	93
G45IP_HUMAN	Q8TAE8	ECPred	Nuclear localization signal	183	199
GPDA_LEIME	P90551	ECPred	Microbody targeting signal	363	365
H2AV_DROME	Q9VBB1	ECPred	[ST]-Q motif	137	138
HOG1_EMENI	Q9P419	ECPred	TXY	170	172
I13R1_HUMAN	P78552	ECPred	Box 1 motif	373	381
KCNC1_HUMAN	P48547	ECPred	Selectivity filter	399	404
LAAT1_RAT	B0BMY1	ECPred	Di-leucine motif	289	290
MATRX_VSIVA	P03519	ECPred	dynamin binding	1	3
MESD_MOUSE	Q9ERE7	ECPred	Prevents secretion from ER	220	223
MGL2_YEAST	Q03649	ECPred	GXSXG	229	233
MK01_HUMAN	P28482	ECPred	Nuclear translocation motif	326	332
MK12_DANRE	O42376	ECPred	TXY	180	182
MK14_HUMAN	Q16539	ECPred	TXY	179	181
MK14_MOUSE	P47811	ECPred	TXY	179	181
MMP8_HUMAN	P22894	ECPred	Cysteine switch	88	95
MU180_SCHPO	Q9HDV1	ECPred	Involved in the stabilization of the negatively charged intermediate by the formation of the oxyanion hole	124	126
MZB1_HUMAN	Q8WU39	ECPred	Prevents secretion from ER	185	188
NCEH1_HUMAN	Q6PIU2	ECPred	Involved in the stabilization of the negatively charged intermediate by the formation of the oxyanion hole	112	114
NUD14_HUMAN	O95848	ECPred	Nudix box	110	128
OXDD1_CAEEL	O45307	ECPred	Microbody targeting signal	331	333
PLPL2_HUMAN	Q96AD5	ECPred	DGA/G	165	167
PLPL2_MOUSE	Q8BJ56	ECPred	DGA/G	165	167
PLPL2_RAT	P0C548	ECPred	DGA/G	165	167
PLSC_BACSU	O07584	ECPred	HXXXXD motif	38	43
PLSC_HELPY	O25903	ECPred	HXXXXD motif	73	78
PLSC_MYCGE	Q49402	ECPred	HXXXXD motif	91	96
PMAT2_ARATH	Q9LRQ8	ECPred	DFGWG motif	394	398
PMK1_CAEEL	Q17446	ECPred	TXY	190	192
RCN1_HUMAN	Q15293	ECPred	Prevents secretion from ER	327	330
REV_HV1H3	P69718	ECPred	Nuclear localization signal and RNA-binding (RRE)	33	49
RGL1_ARATH	Q9C8Y3	ECPred	VHYNP motif	72	76
RITA1_XENLA	P0CJ62	ECPred	Nuclear export signal	11	23
RPN11_YEAST	P43588	ECPred	JAMM motif	108	121
RPPH_SHEON	Q8EH98	ECPred	Nudix box	37	58
SAY1_YEAST	P53324	ECPred	Involved in the stabilization of the negatively charged intermediate by the formation of the oxyanion hole	175	177
SDF1_HUMAN	Q9H554	ECPred	Receptor activation motif	21	22
SKP2_HUMAN	Q13309	ECPred	Nuclear localization signal	66	72
SMO11_ARATH	Q8L7W5	ECPred	Histidine box-3	238	244
SMO22_ARATH	Q8VWZ8	ECPred	Histidine box-3	218	224
SPB10_CHICK	O73790	ECPred	Nuclear localization signal	79	83
SSB_DEIRA	Q9RY51	ECPred	Important for interaction with partner proteins	295	300
STR3N_HUMAN	O95772	ECPred	FFAT	207	212
SYC_ENCCU	Q8SRE0	ECPred	'HIGH' region	32	42
SYC_OPITP	B1ZSX8	ECPred	'HIGH' region	31	41
SYE_MYCPE	Q8EU94	ECPred	'KMSKS' region	254	258
SYE_MYCPU	P53662	ECPred	'KMSKS' region	251	255
SYE_OPITP	B1ZUV7	ECPred	'KMSKS' region	224	228
SYE_PELUB	Q4FM56	ECPred	'KMSKS' region	238	242
SYE_PSEAE	Q9XCL6	ECPred	'KMSKS' region	250	254
SYE_PSEU5	A4VNT7	ECPred	'KMSKS' region	250	254
SYE_RHIME	P15189	ECPred	'KMSKS' region	252	256
SYE_THET8	P27000	ECPred	'KMSKS' region	242	246
SYE_TROW8	Q83HJ1	ECPred	'KMSKS' region	254	258
SYE_VESOH	A5CWX9	ECPred	'KMSKS' region	230	234
SYE1_COXBU	Q83EV3	ECPred	'KMSKS' region	236	240
SYE1_PETMO	A9BJB2	ECPred	'KMSKS' region	229	233
SYE2_ANAMM	Q5PAG8	ECPred	'KMSKS' region	235	239
SYE2_EHRRW	Q5HB98	ECPred	'KMSKS' region	237	241
SYE2_THEMA	Q9X2I8	ECPred	'KMSKS' region	253	257
SYW_ARCFU	O28579	ECPred	'KMSKS' region	307	311
SYW_BACSU	P21656	ECPred	'KMSKS' region	192	196
SYW_BRUME	P67586	ECPred	'KMSKS' region	216	220
SYW_GLOVI	Q7NCG8	ECPred	'KMSKS' region	199	203
SYW_METMA	Q8PWV5	ECPred	'KMSKS' region	374	378
SYW_PYRHO	O59584	ECPred	'KMSKS' region	252	256
SYW_RICCN	Q92HR1	ECPred	'KMSKS' region	194	198
SYW_SACS2	Q97ZX0	ECPred	'KMSKS' region	252	256
SYW_THEAC	Q9HIW5	ECPred	'KMSKS' region	313	317
SYWC_SCHPO	Q09692	ECPred	'HIGH' region	90	99
SYY_ACHLI	A9NHF4	ECPred	'HIGH' region	38	47
SYY_BACTN	Q8A2S5	ECPred	'HIGH' region	36	45
SYY_BRADU	Q89M63	ECPred	'HIGH' region	43	52
SYY_CLOTE	Q891D3	ECPred	'HIGH' region	40	49
SYY_MYCGE	P47693	ECPred	'HIGH' region	40	49
SYY_MYCPE	Q8EUX2	ECPred	'HIGH' region	40	49
SYY_MYCS5	Q4A5E2	ECPred	'HIGH' region	37	46
SYY_ORITB	A5CC73	ECPred	'HIGH' region	38	47
SYY_PARUW	Q6MC06	ECPred	'HIGH' region	37	46
SYY_PYRHO	O58739	ECPred	'KMSKS' region	250	254
SYY_WOLPM	Q73G50	ECPred	'HIGH' region	43	52
SYY1_PYRAE	Q8ZYT7	ECPred	'KMSKS' region	245	249
SYY2_STRT1	Q5LZR6	ECPred	'HIGH' region	37	46
SYYM_DICDI	Q54WD9	ECPred	'HIGH' region	89	98
TBL27_ARATH	O04523	ECPred	DXXH motif	389	392
TGL2_YEAST	P54857	ECPred	(A/G)XSXG lipase motif	141	145
THPR_AQUAE	O66967	ECPred	HXTX 1	41	44
THYX_HELPY	O26061	ECPred	ThyX motif	73	83
TMG4_HUMAN	Q9BZD6	ECPred	LPXY motif; mediates binding to WW domain-containing proteins	185	188
VOA1_YEAST	P53262	ECPred	ER retention motif	261	264
Y2781_YERPE	Q8ZD12	ECPred	Nudix box	72	94
YL446_MIMIV	Q5UQP2	ECPred	GXSXG	92	96
YL620_MIMIV	Q5UR65	ECPred	GXSXG	73	77
YTKD_BACSU	O35013	ECPred	Nudix box	52	73
ZFN2B_HUMAN	Q8WV99	ECPred	CAAX motif	253	256
5H1AA_TAKRU	O42385	DEEPre	NPxxY motif; important for ligand-induced conformation changes and signaling	396	400
5HT1D_PIG	P79400	DEEPre	DRY motif; important for ligand-induced conformation changes	54	56
5HT1D_PIG	P79400	DEEPre	NPxxY motif; important for ligand-induced conformation changes and signaling	271	275
5HT2A_MACMU	P50128	DEEPre	DRY motif; important for ligand-induced conformation changes	171	173
5HT2A_MACMU	P50128	DEEPre	PDZ-binding	468	470
A4GAT_PONPY	Q9N289	DEEPre	DXD motif	56	58
A4GAT_RAT	Q9JI93	DEEPre	DXD motif	198	200
ACO1_YEAST	P21147	DEEPre	Histidine box-2	197	201
AFLJ_ASPPU	Q6UEG5	DEEPre	Involved in the stabilization of the negatively charged intermediate by the formation of the oxyanion hole	84	86
AICDA_BOVIN	Q2PT36	DEEPre	Bipartite nuclear localization signal	0	29
ALKMO_CAEEL	O17554	DEEPre	Histidine box-2	157	161
ALKMO_RAT	A0JPQ8	DEEPre	Histidine box-3	220	224
ANG2_MOUSE	Q64438	DEEPre	Nucleolar localization signal	54	58
AP2A_RAT	P58197	DEEPre	PPxY motif	56	61
AQP11_MOUSE	Q8BHH1	DEEPre	NPC	98	100
AQPZ_FLAJO	Q7WVD3	DEEPre	NPA 1	61	63
ARR20_ARATH	Q9LZJ8	DEEPre	Nuclear localization signal	209	212
BBC3_HUMAN	Q9BXH1	DEEPre	BH3	136	150
BCH_GENLU	B3SGL0	DEEPre	Histidine box-3	249	254
BCH_HAELA	Q9SPK6	DEEPre	Histidine box-3	251	256
BPA_MYCS2	A0R5Z0	DEEPre	HbYX motif	172	174
C2_TPCTV	Q88889	DEEPre	Nuclear localization signal	42	59
CAPSD_BCTVC	P14984	DEEPre	Bipartite nuclear localization signal	9	34
CAPSD_CYLCV	Q7TD09	DEEPre	Nuclear localization signal	121	124
CAPSD_HBVG2	P0C683	DEEPre	Bipartite nuclear localization signal	169	186
CARME_CHICK	F1N9S8	DEEPre	GXGXG motif (S-adenosyl-L-methionine-binding)	242	246
CDCA3_RAT	Q68FW2	DEEPre	KEN box	262	264
CEGT_CRYNH	J9W453	DEEPre	(Q/R)XXRW	322	326
CEGT_KOMPG	C4R4B3	DEEPre	(Q/R)XXRW	360	364
CEGT_MAGO7	G4MS28	DEEPre	D2	159	159
CFIS2_ARATH	Q8GXS3	DEEPre	Nudix box	78	99
CH25H_RAT	Q4QQV7	DEEPre	Histidine box-1	141	145
CH25H_RAT	Q4QQV7	DEEPre	Histidine box-2	156	160
CRLF1_MOUSE	Q9JM58	DEEPre	WSXWS motif	329	333
CRUM3_HUMAN	Q9BUF7	DEEPre	PDZ-binding	116	119
CXE13_ARATH	Q9SMM9	DEEPre	Involved in the stabilization of the negatively charged intermediate by the formation of the oxyanion hole	80	82
CXE18_ARATH	Q9LT10	DEEPre	Involved in the stabilization of the negatively charged intermediate by the formation of the oxyanion hole	93	95
CYREN_RAT	Q6AYH4	DEEPre	KBM	0	20
CYT_BITAR	P08935	DEEPre	Secondary area of contact	46	50
CYT2_ARATH	Q8L5T9	DEEPre	Secondary area of contact	97	101
CYTC_MACMU	O19092	DEEPre	Secondary area of contact	80	84
DCPS_MOUSE	Q9DAR7	DEEPre	nuclear localization signal (NLS)	8	11
DCPS_YEAST	Q06151	DEEPre	Histidine triad motif	265	269
DES3_SORBI	Q594P3	DEEPre	Histidine box-3	305	309
DESA_SYNY3	P20388	DEEPre	Histidine box-2	125	129
DGP3_ARATH	Q8H1F6	DEEPre	DARXP motif	124	128
DPN_DROME	Q26263	DEEPre	WRPW motif	431	434
DRE2_ENTBH	B7XHF3	DEEPre	Cx2C motif 1	69	72
DRE2_TALSN	B8M072	DEEPre	Cx2C motif 1	268	271
E1A_ADE05	P03255	DEEPre	PXDLS motif, CTBP-binding	278	282
E1A_ADE41	P10542	DEEPre	PXDLS motif, CTBP-binding	239	243
E4OR1_ADE09	P89079	DEEPre	PDZ-binding	121	124
ECI3_MOUSE	Q78JN3	DEEPre	Microbody targeting signal	314	316
EF100_ARATH	O80337	DEEPre	Nuclear localization signal	220	236
EPHB3_DANRE	O13147	DEEPre	PDZ-binding	497	499
ERCC1_MOUSE	P07903	DEEPre	Nuclear localization signal	16	22
ERG3_CANAX	O93875	DEEPre	Histidine box-1	225	229
ERG31_SCHPO	O94457	DEEPre	Histidine box-3	224	228
ESX1_HUMAN	Q8N693	DEEPre	Nuclear localization signal	137	142
FAD3C_ARATH	P46310	DEEPre	Histidine box-3	365	369
FAD5B_DICDI	O96099	DEEPre	Histidine box-2	210	215
FAD5B_DICDI	O96099	DEEPre	Histidine box-3	399	403
G1_ORYSJ	Q8GVZ6	DEEPre	Nuclear localization signal	180	184
GLPF_BACSU	P18156	DEEPre	NPA 2	184	186
GRA3_TOXGO	B6KEU8	DEEPre	Prevents secretion from ER	218	221
HES2_MOUSE	O54792	DEEPre	WRPW motif	153	156
HES6_MOUSE	Q9JHE6	DEEPre	WRPW motif	220	223
HFB2B_ORYSJ	Q6Z9C8	DEEPre	Nuclear localization signal	317	321
HMGCL_HUMAN	P35914	DEEPre	Microbody targeting signal	322	324
HNT2_YEAS1	B3LFZ1	DEEPre	Histidine triad motif	95	99
IAA2_ORYSJ	Q9LG86	DEEPre	EAR-like (transcriptional repression)	23	27
ICP27_HHV11	P10238	DEEPre	Nuclear export signal	4	16
IDI2_HUMAN	Q9BXS1	DEEPre	Microbody targeting signal	224	226
IF4A_ENCCU	Q8SQM5	DEEPre	Q motif	37	65
KCNJ4_RAT	P52190	DEEPre	Selectivity filter	133	138
KFA_DEBHA	Q6BT11	DEEPre	HGGXW	32	36
KFA_PICGU	A5DNX8	DEEPre	HGGXW	33	37
KFA_PICST	A3GGU3	DEEPre	HGGXW	32	36
KFA_VANPO	A7TJ85	DEEPre	HGGXW	32	36
KFA_YEAST	Q04066	DEEPre	HGGXW	35	39
LIN7B_MOUSE	O88951	DEEPre	Kinase interacting site	0	12
LIPF_MYCTU	O06350	DEEPre	Involved in the stabilization of the negatively charged intermediate by the formation of the oxyanion hole	19	21
LPAT4_ARATH	Q8L4Y2	DEEPre	HXXXXD motif	104	109
LYSX_SULTO	Q976J9	DEEPre	N-[TS] motif that is essential for LysX substrate specificity	261	262
MAPK2_HUMAN	P49137	DEEPre	Bipartite nuclear localization signal 2	384	388
MBD12_ARATH	Q9FZP6	DEEPre	MBD-associated domain (MAD)	2	44
MESD_HUMAN	Q14696	DEEPre	Prevents secretion from ER	230	233
MIP1B_ARATH	Q9LRM4	DEEPre	PFVFL	116	120
MPZL1_MOUSE	Q3TEW6	DEEPre	ITIM motif 2	261	266
MSMO_YEAST	P53045	DEEPre	Histidine box-1	159	163
MUC1_HYLLA	Q29435	DEEPre	Interaction with SRC and ESR1	448	451
MYB48_ARATH	Q9LX82	DEEPre	Bipartite nuclear localization signal 1	60	63
NB1_MYCMM	B2HH20	DEEPre	GXWXGXG	68	74
NECP1_RAT	P69682	DEEPre	WXXF motif 2	273	276
NP1L2_MOUSE	P51860	DEEPre	Nuclear localization signal	345	351
NPY1_YEAST	P53164	DEEPre	Microbody targeting signal	377	379
NSF1C_RAT	O35987	DEEPre	Nuclear localization signal	171	174
NUD14_ARATH	Q9SZ63	DEEPre	Nudix box	178	199
NUDC_DEIRA	Q9RV62	DEEPre	Nudix box	177	198
P53_EQUAS	Q29480	DEEPre	Bipartite nuclear localization signal	180	196
P53_HORSE	P79892	DEEPre	Bipartite nuclear localization signal	255	271
PHF13_HUMAN	Q86YI8	DEEPre	Nuclear localization signal	109	126
PLCA_SHEEP	Q95JH0	DEEPre	EGTR motif	177	180
PLPL4_HUMAN	P41247	DEEPre	DGA/G	162	164
PLPP3_MOUSE	Q99JY8	DEEPre	Integrin-binding motif	182	184
PLSC_STRR6	Q8DNY1	DEEPre	HXXXXD motif	56	61
PPR3C_BOVIN	Q0VCR4	DEEPre	PP1-binding motif	83	86
PROFA_OLEEU	O24169	DEEPre	Involved in PIP2 interaction	83	99
PRUN1_MOUSE	Q8BIW1	DEEPre	DHH motif	105	107
PTTG1_HUMAN	O95997	DEEPre	TEK-box 2	93	95
PXP2_SCHPO	O74758	DEEPre	Peroxisomal target signal 1 (PTS1)	210	212
PYR1_ARATH	O49686	DEEPre	Latch loop	114	116
RAD10_YEAST	P06838	DEEPre	Nuclear localization signal	16	22
REV_BIV29	P24097	DEEPre	Nuclear export signal	101	114
REV_HV2KR	Q74125	DEEPre	Nuclear localization signal and RNA-binding (RRE)	34	48
RFXAP_MOUSE	Q8VCG9	DEEPre	Nuclear localization signal	122	137
RSSA_ECOLI	P0AFR0	DEEPre	DGA/G	154	156
RX3_DANRE	O42358	DEEPre	OAR	271	284
S39AD_BOVIN	A5D7H1	DEEPre	XEXPHE-motif	256	261
SBH1_ARATH	Q8VYI1	DEEPre	Histidine box-3	206	212
SC5D1_ARATH	Q39208	DEEPre	Histidine box-3	237	241
SCNM1_XENLA	Q3KQ71	DEEPre	Bipartite nuclear localization signal	3	19
SDF2L_HUMAN	Q9HCN8	DEEPre	Prevents secretion from ER	217	220
SIB1_ARATH	Q9LDH1	DEEPre	Bipartite nuclear localization signal	15	31
SIGR_STRCO	Q7AKG9	DEEPre	Polymerase core binding	62	65
SLAF1_MOUSE	Q9QUM4	DEEPre	ITSM 1	285	290
SLBP_MOUSE	P97440	DEEPre	Nuclear localization signal NLS2	95	98
SMO12_ARATH	Q1EC69	DEEPre	Histidine box-2	159	163
SMO22_ARATH	Q8VWZ8	DEEPre	Histidine box-1	126	130
SP4A_BACAN	Q81SW4	DEEPre	Walker A motif; involved in ATP-binding	23	30
SPL14_ORYSJ	Q7EXZ2	DEEPre	Bipartite nuclear localization signal	160	176
SSB1_LISIN	Q92FR5	DEEPre	Important for interaction with partner proteins	173	178
SYE2_SPHAL	Q1GNX2	DEEPre	'HIGH' region	8	18
SYW_COREF	Q8FRR3	DEEPre	'KMSKS' region	206	210
SYW_RHILO	Q98C31	DEEPre	'KMSKS' region	216	220
SYWM_YEAST	P04803	DEEPre	'KMSKS' region	243	247
SYY_PROMA	Q7VAP7	DEEPre	'KMSKS' region	248	252
TBL13_ARATH	Q9ZQR5	DEEPre	GDS motif	136	138
TIM13_CRYNB	P0CS01	DEEPre	Twin CX3C motif	46	69
TXD12_BOVIN	Q5E936	DEEPre	Prevents secretion from ER	168	171
U24_HHV6Z	Q9QJ42	DEEPre	PPXY motif	7	10
URIC_DICDI	Q54LT2	DEEPre	Microbody targeting signal	284	286
VM2AL_TRIAB	P0C6B6	DEEPre	Cell attachment site; atypical (KGD)	461	463
VMA21_COCIM	Q1DPX9	DEEPre	Prevents secretion from ER	123	126
VMA21_CRYNB	P0CS25	DEEPre	Prevents secretion from ER	100	103
WHY1_SOLTU	Q9LL85	DEEPre	Nuclear localization signal	177	190
WIPI2_HUMAN	Q9Y4P8	DEEPre	L/FRRG motif	240	243
ZDHC4_HUMAN	Q9NPG8	DEEPre	Di-lysine motif	340	343
